# Supplementary material
Source: PubMed Central journal article supplement (PMC7126918)
Supplement: mmc1.pdf [file mmc1.pdf]

**Projet de Coordination des  
Urgences infectieuses et du  
Risque Epidémique et  
Biologique  
en Ile de France**

Version du 15 déc 2010

**PROCEDURE STANDARDISEE de PRISE EN CHARGE**  
**PAR LES URGENCES ET LES SMUR**  
**DES PATIENTS SUSPECTS D'INFECTIONS A RISQUE EPIDEMIQUE ET BIOLOGIQUE**  
**(REB) EN ILE DE FRANCE**

---

**Sommaire**

1. Résumé
2. Contexte – Objectifs – Principe – Définitions (agents infectieux, modalités de transmission, patients symptomatiques, personnes exposées)
3. Modalités de recours et repérage des cas suspects
4. Prise en charge SAU
  - 4.1 Pré requis
  - 4.2 Patients symptomatiques
    - Estimation du risque d'infection REB SAMU Centre 15
    - Mesures de protection individuelles et collectives
    - Évaluation clinique et traitement du patient suspect
    - Prise en charge prélèvement
    - Gestion des déchets
  - 4.3 Personnes exposées asymptomatiques
5. Prise en charge SMUR
  - 5.1 Objectifs de la procédure
  - 5.2 Situations de prise en charge
  - 5.3 Mission de transport
  - 5.4 Protections
  - 5.5 Produits de nettoyage
  - 5.6 Principes de prise en charge
6. Modalités d'alerte et d'information

Annexe 1 : Agents infectieux nécessitant un isolement

Annexe 2 : Références réglementaires – Liste des maladies à déclaration obligatoire

Annexe 3 : Questionnaire pour l'accueil et l'orientation

**PROPOSITION DE PROCEDURE STANDARDISEE de PRISE EN CHARGE**  
**PAR LES URGENCES ET LES SMUR**  
**DES PATIENTS SUSPECTS D'INFECTIONS A RISQUE EPIDEMIQUE ET**  
**BIOLOGIQUE (IREB) EN ILE DE FRANCE**

---

## **1. RESUME**

Le risque de maladies infectieuses émergentes liées à l'histoire naturelle du vivant ou liées au bioterrorisme est une réalité. L'histoire du SIDA, du SRAS, du charbon l'ont bien rappelé. Il y aura toujours des maladies infectieuses nouvelles, comme le disait Charles Nicolle. Les changements environnementaux, le réchauffement climatique, l'évolution démographique, l'urbanisation, la mondialisation des échanges, les transports internationaux, les contacts entre les hommes et la faune sauvage et le commerce non contrôlé d'organismes vivants induit par la généralisation d'Internet exposent au risque d'émergence de nouvelles épidémies et de dissémination planétaire rapide d'agents pathogènes virulents, épidémiques et de plus en plus résistants aux thérapeutiques.

L'Organisation Mondiale de la Santé a lancé récemment des alertes virales (SRAS, H5N1, H1N1) ou bactériennes concernant la diffusion en communauté d'un clone de *Staphylococcus aureus* résistant à la méticilline (SARM) et celle de souches de tuberculose très résistantes (XDR-TB). Par ailleurs, de nombreuses bactéries responsables d'épidémies nosocomiales sont devenues multi résistantes et à l'origine de situations d'impasse thérapeutique.

Afin de contrôler la diffusion d'agents à risque épidémique connus ou émergents, de protéger les patients et le personnel, des mesures d'intérêt collectif intriquées avec une prise en charge individuelle optimale sont requises : dépistage précoce, isolement et mesures barrières adaptés dès l'arrivée, techniques d'hygiène et d'éducation du personnel ont montré leur efficacité. Le diagnostic et le traitement rapides des patients atteints d'infection contagieuse contribuent également à réduire le risque de dissémination. L'impact des mesures est maximal lorsque le nombre de cas est encore faible et qu'il existe des capacités d'isolement des circuits de prise en charge. C'est insister ici sur l'importance d'interventions adaptées le plus précocement possible. L'expérience en 2003 du SRAS à Toronto a montré qu'une prise en compte

insuffisante du risque aux urgences de l'hôpital exposait à un risque sanitaire majeur. Ceci impose des règles qui impliquent les établissements concernés en première ligne, mais au-delà de ceux-ci l'institution en elle-même avec l'Agence Régionale de Santé (ARS), et l'Institut de Veille Sanitaire (InVS), organisme national, et sa structure régionale, la Cellule d'Intervention Régionale d'Epidémiologie (CIRE). Et si l'aspect collectif et les craintes rencontrées doivent être pris en compte rapidement, la prise en charge individuelle du malade est tout aussi nécessaire dans le même temps.

## **2. CONTEXTE – OBJECTIFS - DEFINITIONS (agents infectieux, modalités de transmission, patients symptomatiques, personnes exposées)**

### ➤ **Contexte**

Les infections REB regroupent les infections en rapport avec un risque épidémique et/ou un acte bio-terroriste (Annexe 1). Elles ont en commun leur gravité et/ou leur contagiosité (c'est-à-dire leur propension à toucher un grand nombre de personnes).

Les propositions présentées s'inscrivent dans le cadre de plans et démarches réglementaires nationaux et internationaux cités en référence (Annexe 2 : plan Urgences, plan BIOTOX, plan peste-charbon-tularémie, plan pandémie grippale, plan SRAS, procédures environnementales et d'hygiène) et notamment dans la démarche de mise en conformité de l'organisation française avec le nouveau règlement sanitaire international (RSI) élaboré par l'OMS.

Le but principal de la procédure élaborée par le groupe pour la coordination des Urgences infectieuses et du réseau risque épidémique et biologique (CO REB) est une prise en charge standardisée, simple et applicable quelle que soit la structure de recours par le patient (Services d'Accueil des Urgences et Services Mobiles d'Urgence et de Réanimation), en amont des hôpitaux référents CO REB.

Tous les hôpitaux doivent se doter de procédures permettant d'aménager un circuit, des locaux, et une organisation dédiés, pré-identifiés, immédiatement re-convertibles de leur usage habituel vers cette fonction, dès lors qu'un (des) patient(s) suspect(s) d'infection REB est (sont) dépisté(s) (situation épidémique ou cas sporadique). Les annexes 3 à 7 détaillent certains de ces éléments au sein de l'AP-HP.

**NB : Ces procédures sont susceptibles d'être modifiées en fonction de l'acquisition des nouvelles données épidémiologiques, cliniques ou diagnostiques.**

➤ **Objectifs de la procédure**

La procédure élaborée par le groupe CO REB vise à :

- **optimiser et standardiser la prise en charge** des patients suspects d'être porteurs ou infectés par des agents infectieux à risque épidémique dans toutes les structures d'urgence en Ile de France
- **organiser la régulation et les transports** dans de bonnes conditions d'hygiène par les SAMU départementaux
- **préciser la place des médecins et hôpitaux référents REB** dans l'organisation REB et NRBC de la région Ile de France, et faciliter le lien avec l'InVS.

Plus précisément, elle a pour objet de :

- Améliorer et homogénéiser la prise en charge précoce au SAU des patients suspects d'infections REB
- Orienter la prise en charge de ces patients vers des services spécialisés, référents CO REB
- Eviter le contact entre les patients suspects d'infections REB et les autres patients du SAU, le personnel soignant et les sujets contacts
- Assurer la protection des personnels chargés de la prise en charge de patients suspects d'infections REB

➤ **Principe général**

Un référent REB est disponible par l'intermédiaire du SAMU Centre 15 pour discuter 24h/24, si nécessaire, des différents points de la procédure, et aider les médecins urgentistes dans leurs prises de décision.

Toute activation de la procédure CO REB nécessitant un transfert vers un centre référent doit passer par l'approbation du médecin référent REB.

➤ **Définition des agents infectieux REB**

On regroupe ici des agents infectieux avec un haut potentiel épidémique, nosocomial ou communautaire, et des agents utilisables pour le bioterrorisme (classification CDC en A, B, C), l'un n'excluant pas l'autre (Annexe 1).

Ces agents infectieux ont en commun deux caractéristiques principales : leur haute contagiosité c'est-à-dire leur propension à toucher un grand nombre de personnes et/ou leur gravité.

Ils peuvent être émergents ou re-émergents.

➤ **Définition des modalités de transmission**

On peut distinguer deux modalités de transmission d'un agent infectieux : la transmission par contact de personne à personne (grippe, SRAS, SARM, variole...) et la transmission par exposition à partir d'une source commune contaminée (aliment, eau, aérosol, ou vecteur). La distinction de ces deux modalités est importante car l'analyse et les mesures de maîtrise de l'épidémie en seront influencées. Dans les deux cas, il est important de déterminer le lien épidémiologique entre les personnes suspectes d'infection REB.

➤ **Définition des patients symptomatiques**

Les patients symptomatiques sont les personnes présentant des signes cliniques et biologiques d'infection dans des circonstances d'exposition compatibles avec la suspicion d'une infection REB.

➤ **Définition des personnes exposées**

Les personnes exposées sont des personnes asymptomatiques ayant eu un lien épidémiologique ou un contact avec un patient symptomatique suspect d'infection REB ou avec une source contaminée par un agent infectieux REB.

### **3. MODALITES DE RECOURS ET REPERAGE DES CAS SUSPECTS**

**Cette étape initiale est décisive pour la bonne prise en charge ultérieure. Compte tenu des risques individuels, et surtout collectifs, d'interventions imparfaitement adaptées à ce stade, elle doit être menée par un médecin urgentiste senior, validée, si le risque se confirme par le médecin régulateur du SAMU-centre 15. Celui-ci peut prendre avis du médecin référent REB 24h/24. Dans ce cas, le questionnaire d'accueil et d'orientation**

**des patients « cas en cours d'investigation » pour suspicion d'infection REB doit être rempli. Facilitant le repérage et la bonne orientation des patients suspects d'infection REB, il figure en annexe 3.**

➤ **Appel téléphonique du patient ou de son entourage ou du médecin généraliste :**

- La personne répondeuse note les coordonnées du patient ou de son entourage
- Le médecin du SAU contacte le médecin régulateur du SAMU Centre 15
- Le SAMU Centre 15, correspondant à la commune de localisation du patient, recontacte celui-ci ou son entourage

➤ **Arrivée spontanée du patient aux Urgences**

- **Auto signalement du patient**
  - Si un patient vient consulter pour **toux + notion de fièvre** : il doit lui être demandé de porter un masque en attendant d'être examiné (ceci est valable pour la suspicion d'autres pathologies comme la tuberculose, la grippe saisonnière etc.)
    - ➔ Panneau à l'entrée du SAU demandant au patient de mettre un masque chirurgical en attendant d'être vu par un médecin
  - Si, en situation d'épidémie, un patient vient consulter pour des symptômes apparus au retour d'une zone où sévit une épidémie, il lui est demandé de se signaler immédiatement à l'IAO.
- **Patient dépisté par Infirmière d'Aide et d'Orientation (IAO), interne, ou médecin**

La détection d'un patient suspect d'infection REB doit être réalisée le plus précocement possible lors du recours à la structure de soins, afin de limiter le risque de dissémination et de diagnostic tardif.

## **4- PRISE EN CHARGE AUX URGENCES**

### **4.1 Pré requis**

Dès la suspicion d'une infection REB, la procédure standardisée REB est mise en œuvre.

**Préalable nécessaire : procédure maîtrisée par les Urgences**

- locaux pré-identifiés

- zone tampon disponible
- signalétique (affiches amovibles disponibles) : délimitation d'une zone d'accès contrôlé interdit sans autorisation
- circuit des prélèvements pré-identifiés
- personnel médical et paramédical formé et entraîné présent H24

Deux cas de figure, assez différents, peuvent se présenter :

- le patient symptomatique suspect d'infection REB
- la personne asymptomatique suspecte d'infection REB, car possiblement exposée

#### **4.2 Patient symptomatique suspect d'infection REB**

L'estimation du risque par des experts, urgentiste senior, SAMU, REB est déterminante pour décider des modalités de prise en charge. Elle vise à évaluer la probabilité de maladie en rapport avec une infection REB, mettant en jeu, non seulement le pronostic du patient suspect, mais aussi celui des personnes l'ayant côtoyé : proches, autres patients, personnel soignant et personnel assurant le transport. Elle permet de mener la stratégie diagnostique et thérapeutique dans des conditions de sécurité optimales. La conduite à tenir comporte, en effet, une intrication complexe de mesures individuelles et collectives soigneusement orchestrées, et adaptées selon le niveau de risque.

#### ➤ **Estimation du risque d'infection REB faite avec le SAMU Centre 15**

L'estimation du risque est appréciée sur la conjugaison (cf. définition de cas)

- d'une **anamnèse compatible** car :
  - une épidémiologie compatible : retour de zone épidémique ou endémique
  - une exposition compatible,
  - un délai entre exposition potentielle et premiers symptômes compatible
- **et d'une symptomatologie clinique compatible** :
  - en gardant en mémoire la grande diversité de présentation clinique des infections par différents agents infectieux répertoriés (cf. annexes)
  - en restant en éveil devant un tableau clinique inhabituel pouvant faire évoquer un agent émergent ou re-émergent



## Questionnaire uniformisé (Annexe 3)

### Classement de la suspicion

| Anamnèse     | Clinique   | Risque d'infection REB | Diagnostic                             | Niveau de prise en charge des prélèvements+ |
|--------------|------------|------------------------|----------------------------------------|---------------------------------------------|
| Compatible   | Evocatrice | Elevé                  | Cas possible                           | rouge                                       |
| Compatible   | Atypique   | Faible                 | Cas en cours d'investigation = douteux | orange                                      |
| Incompatible | Evocatrice | Faible                 | Cas en cours d'investigation = douteux |                                             |
| Incompatible | Atypique   | Nul                    | Cas exclu                              |                                             |

Le classement de la suspicion d'un patient donné n'est pas toujours facile. En cas de difficultés l'appel au référent REB est recommandé.

#### ➤ Mesures de protection individuelles et collectives (Annexes 4 à 6)

Dès la suspicion, et jusqu'à ce qu'elle ait été levée :

- **Isolement géographique** du patient dans un box de consultation à l'écart des autres patients
- pas de visite, pas de déplacements
- **Mobilisation d'une équipe soignante limitée et dédiée**

Elle comporte notamment :

- 1 infirmière équipée, formée, entraînée
- 1 médecin équipé, formé, entraîné

- **Mesures de protection standardisées pour le patient et les soignants = isolement respiratoire + isolement contact :**

Les mesures ci-dessous figurées sont suffisantes dans la plupart des infections hautement contagieuses.

## PROTECTION STANDARDISEE REB – PATIENTS et SOIGNANTS\*.\*\*

|                  | <b>Isolement respiratoire</b>           |   | <b>Isolement contact</b>        |
|------------------|-----------------------------------------|---|---------------------------------|
| <b>Patients</b>  | Masque anti projection<br>(chirurgical) | + | SHA                             |
| <b>Soignants</b> | Masque FFP2                             |   | SHA-gants-sur blouse-<br>pyjama |

\* En cas de geste invasif à risque de projection, le port de lunettes est fortement recommandé.

Rappel : les lunettes de vues ne sont pas protectrices et elles ne dispensent pas du port des lunettes de protection.

\*\* Recommandations essentielles et indispensables dans tous les cas. Pour certaines infections spécifiques, des mesures spécifiques sont recommandées.

Des mesures spécifiques sont recommandées dans certaines situations particulières figurant en annexe 6.

- **Au niveau du box d'isolement : matériel à usage dédié et unique (conteneur DASRI)**
  - arrêt tout système de ventilation-climatisation, chaque fois que possible
  - aération de la pièce par simple ouverture de fenêtre (même en hiver)

### ➤ Evaluation clinique et traitement du patient suspect

Les premières mesures sont prises au SAU selon les procédures du SAU, si besoin en collaboration avec le SAMU Centre 15

- **Evaluation du niveau d'urgence = soins prioritaires**
  - Signes de détresse vitale : appel du réanimateur de garde puis
  - Appel du SAMU Centre 15, informé de la suspicion d'infection REB
- **En cas de sepsis grave et de choc septique, bactérien ou parasitaire**

Si la gravité de l'état du malade le justifie, la priorité est donnée aux soins sur place, avant le transfert en service référent REB. Selon les circonstances, et si tout retard thérapeutique risque d'être préjudiciable au malade, un traitement peut être débuté dans le SAU de premier recours (traitement symptomatique et réanimatoire, antibiotique, quinine, ou oseltamivir en accord avec le référent REB...).

### ➤ Prise en charge des prélèvements

**La réalisation et les modalités de transport et de manipulations de prélèvements biologiques en vue d'examens para-cliniques sont modulées selon le niveau de risque estimé (Tableau ci-dessus) (Annexe 7) :**

*Niveau rouge* : aucun prélèvement n'est réalisé sur place. Le patient est transféré dans un service référent, le plus rapidement possible par le SAMU Centre 15.

*Niveau orange* : les conditions imposées par la probabilité d'infection REB ne doivent pas entraver la conduite diagnostique et thérapeutique d'une urgence infectieuse « ordinaire », type paludisme, sepsis grave, méningite. Il convient de réaliser les prélèvements minimaux pour éliminer ces diagnostics :

*frottis goutte épaisse, hémocultures, bandelette urinaire, NFS, plaquettes, CRP, ionogramme sanguin, transaminases, créatininémie, radio au lit, à discuter selon les orientations diagnostiques alternatives.*

➔ Nécessité d'un circuit pré-identifié pour ce type de prélèvements, dans tous les hôpitaux ayant un SAU.

➔ Ces prélèvements sont transportés sous triple emballage (en raison de la suspicion REB) et gérés sous hotte, dans l'hôpital de 1<sup>er</sup> recours.

➤ **Gestion des déchets et nettoyage**

Les mesures recommandées figurent en annexe 8.

### **4.3 Personnes exposées asymptomatiques**

Face à une suspicion d'infection REB, il est nécessaire, en même temps, de mettre en place une investigation ayant pour but de confirmer le diagnostic de l'agent infectieux suspecté, et d'identifier une population potentiellement exposée. Cette double approche permet de guider les mesures préventives à instituer pour limiter la propagation de la maladie et d'assurer un suivi de cette population exposée. Les mesures de prévention seront centrées sur l'interruption de la transmission de personne à personne (mesures barrières) ou, pour les expositions à partir d'une source commune, le contrôle de la source si elle est accessible et connue (poudre). Une prophylaxie médicamenteuse peut être ajoutée dans l'une ou l'autre de ces situations, en fonction de l'agent infectieux, et après avis du médecin REB.

#### ➤ **Conduite à tenir**

- Interrogatoire minutieux à la recherche d'une exposition avec analyse des circonstances précises de l'exposition
- Recensement de toute personne ayant eu un lien épidémiologique avec un agent infectieux suspecté (contact étroit familial, professionnel ou géographique durant la période d'incubation théorique de la maladie suspectée, ou personne ayant contribué à une activité de soins en l'absence de mesures de préventions efficaces)
- Traçabilité avec identification complète des personnes (nom, prénom, adresse, téléphone, etc...)
- Consultation médicale avec examens clinique +/- para-cliniques
- Prise en charge appropriée selon l'agent infectieux et le mode de transmission, avec décontamination, et/ou prophylaxie médicamenteuse, et/ou vaccination
- Retour et maintien à domicile, dans l'attente d'informations complémentaires ultérieures
- Surveillance clinique à domicile par le médecin traitant informé, à la recherche de l'apparition de signes cliniques évocateurs de l'infection et contact avec un médecin référent REB en cas de doute
- Hospitalisation et isolement dans un service référent REB au moindre signe clinique en rapport avec la maladie suspectée.

#### ➤ **En cas de nécessité d'hospitalisation**

Contactez le SAMU afin de discuter les modalités du transport.

## **5. PROCEDURE UNIFORMISEE DE PRISE EN CHARGE DES PATIENTS SUSPECTS D'INFECTION REB EN SMUR**

### **5.1 Objectifs de la procédure**

- Améliorer la prise charge des patients ayant un risque REB
- Homogénéiser et améliorer la protection des patients et des soignants devant un risque REB en tenant compte des conditions particulières de prise en charge des patients en SMUR

### **5.2 Situations de prise en charge d'infection REB en SMUR nécessitant une protection des patients et des soignants**

#### ➤ **Risque de contamination en intervention primaire**

Le risque est déterminé sur l'association des données de l'anamnèse (exposition, épidémiologie, délai) et de l'examen clinique.

Lorsque la situation correspond à une pathologie bien identifiée voir la « procédure universelle ».

#### ➤ **Risque de contamination en intervention secondaire, mesures de protection des personnels**

Le risque aura été identifié par le service où se situe le patient. En collaboration avec le SMIT (Service de Maladies Infectieuses et Tropicales) référent, le SAMU, le service adressant le patient explique les règles d'isolement et de protection qui auront été définies à l'équipe de prise en charge et s'assure de sa bonne application.

### **5.3 Mission de transport d'un patient suspect d'infection REB**

En cas d'infection REB, dans tous les cas c'est le médecin régulateur du SAMU qui missionne l'équipe qui réalisera le transfert, que cette équipe soit médicalisée ou non.

Le médecin régulateur du SAMU s'assure de la bonne information de l'équipe sur les règles de protection et le suivi de l'intervention.

### **5.4 Protections**

#### ➤ **Le patient**

- *En intervention primaire :*

- *Il doit être isolé le plus rapidement possible des sujets contacts, au mieux dans l'Unité Mobile Hospitalière (UMH)*
- *Dans tous les cas :*
  - Isolement contact et respiratoire :
  - Pyjama de bloc ou casaque : uniquement dans le cas de risque pourde.
  - SHA
  - Masque anti projection (chirurgical)
- **Les sujets contacts**
  - Ils doivent être isolés, répertoriés,
  - Leur prise en charge et leur orientation sera à apprécier en collaboration avec le SAMU et le SMIT.
- **Les soignants et les personnels assurant le transport**
  - Isolement contact et respiratoire :
    - Sur blouse recouvrant les manches
    - Charlotte (cheveux attachés et « rangés » dans la charlotte)
    - Gants à usage unique
    - Lunettes anti-projection pour la réalisation de gestes à risque (voie veineuse, intubation, etc...) et si le patient ne supporte pas le masque anti projection.
    - SHA
    - Masques FFP2

### 5.5 Produits de nettoyage à utiliser en fonction de l'agent infectieux

| Circonstances                         | Surfanios | Nettoyeur vapeur | Deterg' anios | Eau de javel | Rinçage | Lieu de nettoyage     |
|---------------------------------------|-----------|------------------|---------------|--------------|---------|-----------------------|
| Poudre suspecte                       |           | X                |               |              |         | Base (retour indispo) |
| Grippe Aviaire / SRAS                 | X         |                  |               |              |         | Hop destination*      |
| BK - Méningite                        | X         |                  |               |              |         | Hop destination*      |
| BMR                                   | X         |                  |               |              |         | Hop destination*      |
| Variole, Clostridium difficile, Ébola |           | X (ou) X         |               | X            | X       | Base (retour indispo) |

*SRAS : syndrome respiratoire aigue sévère, BK : tuberculose, BMR : bactérie multi résistante,*

*\* en pratique, même dans ces circonstances, il est d'usage de rentrer « indispo » et de nettoyer l'UMH à la base, avec un procédé de pulvérisation sèche de peroxyde d'hydrogène Nocospray®*

### 5.6 Principes de prise en charge d'un patient présentant un risque REB

- **Isolement du patient et du brancard, avec l'ensemble du matériel positionné dessus**

- Principe = apparenter l'ensemble patient - brancard comme environnement possiblement contaminé,
- Contact des intervenants avec l'ensemble patient – brancard ne doit se faire qu'avec les tenues de protection.
- **Lors des déplacements hors de l'UMH**
  - L'ensemble patient – brancard + ambulancier + infirmier SMUR reste isolé et évite de coloniser l'environnement (*portes, boutons d'ascenseur, ...*).
  - Le médecin SMUR retire sa tenue d'isolement, se lave les mains avec un SHA, et facilite le déplacement. C'est lui qui ouvre les portes de l'UMH.
- **Une fois le patient installé dans l'UMH**
  - L'ambulancier retire sa tenue d'isolement et ses gants, les jette dans un sac à déchets, utilise sur ses mains du Stérilium®, referme les portes de l'UMH et s'installe au poste de conduite.
- **Durant le transport**
  - Patient stable : 1 soignant reste protégé (habillé), au contact de l'ensemble patient – brancard. L'autre soignant qui n'est plus isolé ne s'approche pas de l'ensemble patient – brancard et transmet au soignant isolé les éléments nécessaires situés ailleurs (dans les tiroirs, ...)
  - Si les 2 soignants doivent être au contact de l'ensemble patient – brancard, les 2 doivent être habillés. Les éléments de l'UMH qui auront été touchés seront à nettoyer tout sera nettoyé de toute façon
- **Dans le SMIT**
  - Une fois le patient installé, retrait des protections, lavage des mains et application de SHA.
  - Nettoyage soigné avec le produit de désinfection préconisé dans la procédure de bio-nettoyage désinfection (PBND) de tout le matériel utilisé, avant de quitter le service. Cette opération doit être faite en tenue de protection : lunettes, charlotte, gants.

## **6. MODALITES D'ALERTE ET D'INFORMATION (Annexe 10)**

- **Médecin senior SAU**
  - Confirme la suspicion après interrogatoire, examen clinique
  - Débute la prise en charge diagnostique et thérapeutique selon situation
  - Confirme le maintien des mesures d'isolement COREB

- Dresse la liste des sujets contacts
- Informe le cadre d'astreinte et l'administrateur de garde de son établissement

➤ **SAMU Centre 15**

- Aide à l'estimation du risque REB avec le médecin senior du SAU
- Aide à l'orientation vers centre COREB, après contact et avis du médecin COREB d'astreinte
- Aide et veille à la prise en charge optimisée en SAU et en UMH
- Disponible 24/24, 7/7, 365 jours/an
- Est le point de contact avec le médecin référent REB
- Alerte la direction du SAMU et la préfecture de département, et le SAMU et la préfecture de zone de défense selon la gravité de la situation

➤ **Référent REB**

- Médecin senior spécialiste de maladies infectieuses, expérimenté, REB d'astreinte de sécurité 24/24
- Répond aux sollicitations des SAMU d'Ile de France
- Evalue le risque et l'indication des mesures d'isolement, des démarches diagnostiques et thérapeutiques
- Informe et complète l'évaluation clinico-épidémiologique avec l'épidémiologiste permanent de garde du département des maladies infectieuses de l'Institut de Veille Sanitaire
- Organise l'accueil en centre référent REB, en liaison avec le médecin responsable du SMIT de l'hôpital référent en vue d'un transfert, informe le personnel receveur
- Informe l'administrateur de l'établissement référent et l'administrateur de l'AP-HP, Direction de la politique médicale.
- Fait un signalement téléphonique et par fax à la plateforme régionale unique de réception de signaux sanitaires de l'ARS.

➤ **Acteurs institutionnels -ARS-InVS / CIRE**

Ils doivent être impérativement informés au plus tôt, qu'il s'agisse d'une infection à déclaration obligatoire (Annexe 2) ou de toute infection inhabituelle, pouvant être contagieuse et grave. Le contact est établi par le SAMU et le médecin référent REB. Il permet aux acteurs institutionnels d'engager la réflexion sur les sujets contacts.



# ANNEXE 1

## Agents infectieux nécessitant un isolement

### Agents nécessitant un isolement (cas sporadique ou épidémique)

Toute infection dont l'agent infectieux n'est pas identifié, mais dont les caractéristiques épidémiologiques font craindre une forte transmission interhumaine, en particulier toute infection respiratoire « inhabituelle »

| Maladies                                         | Agents infectieux suspectés ou confirmés                                                                                                                                                                          |
|--------------------------------------------------|-------------------------------------------------------------------------------------------------------------------------------------------------------------------------------------------------------------------|
| Grippe aviaire, grippe pandémique                | <i>Myxovirus influenzae H5- N1, HxNy</i>                                                                                                                                                                          |
| SRAS                                             | Coronavirus                                                                                                                                                                                                       |
| Fièvres hémorragiques virales                    | Virus Ebola*<br>Virus Marburg*<br>Virus de Lassa*<br>Virus Crimée-Congo<br><br><i>Virus Machupo*</i><br><i>Virus Junin*</i><br><i>Virus Guanarito</i><br><i>Virus Sabbia</i><br><i>Virus de la Vallée du Rift</i> |
| Variole                                          | Virus de la variole*                                                                                                                                                                                              |
| Monkeypox                                        | Virus Monkeypox                                                                                                                                                                                                   |
| Charbon (Maladie du-, ou bactériodie)            | <i>Bacillus anthracis*</i>                                                                                                                                                                                        |
| Tuberculose MDR, XDR                             | <i>Mycobacterium tuberculosis</i> résistants aux antibiotiques                                                                                                                                                    |
| Bactéries multirésistantes...                    | BGN carbapénémase +...                                                                                                                                                                                            |
| Peste, principalement dans sa forme respiratoire | <i>Yersinia pestis*</i>                                                                                                                                                                                           |
| Meliodose                                        | <i>Burkholderia mallei</i>                                                                                                                                                                                        |

\* : agents pouvant être utilisé en bioterrorisme

### Agents ne nécessitant pas d'isolement mais pouvant être utilisés en bioterrorisme

| Maladies   | Agents infectieux suspects ou confirmés |
|------------|-----------------------------------------|
| Botulisme  | Toxine de <i>Clostridium botulinum*</i> |
| Tularémie  | <i>Francisella tularensis*</i>          |
| Fièvre Q   | <i>Coxiella burnetti*</i>               |
| Brucellose | <i>Brucella spp*</i>                    |

\* : agents pouvant être utilisé en bioterrorisme

## ANNEXE 2

### Références réglementaires

| NOM                                                               | TITRE                                                                                                                                                               | DATE           | ADRESSE INTERNET                                                                                                                                                                                                                                        |
|-------------------------------------------------------------------|---------------------------------------------------------------------------------------------------------------------------------------------------------------------|----------------|---------------------------------------------------------------------------------------------------------------------------------------------------------------------------------------------------------------------------------------------------------|
| Secrétariat Général de la Défense Nationale                       | Plan national de prévention et de lutte « Pandémie Grippale »                                                                                                       | 9 janvier 2007 | <a href="http://www.grippeaviaire.gouv.fr">www.grippeaviaire.gouv.fr</a><br><a href="http://www.sante.gouv.fr">www.sante.gouv.fr</a><br><a href="http://www.diplomatie.gouv.fr">www.diplomatie.gouv.fr</a>                                              |
| Ministère de la santé, de la famille et des personnes handicapées | Conduite à tenir pour la prise en charge des personnes présentant un syndrome ou une suspicion de syndrome respiratoire aigu sévère (SRAS) et des personnes contact | 06 avril 2004  | <a href="http://www.invs.sante.fr">www.invs.sante.fr</a><br><a href="http://www.who.int">www.who.int</a><br><a href="http://www.hc-sc.gc.ca">www.hc-sc.gc.ca</a><br><a href="http://www.cdc.gov/nc">www.cdc.gov/nc</a>                                  |
| Ministère de la Santé et des Solidarités                          | Bioterrorisme et mesures environnementales en milieu de soins                                                                                                       | Juin 2006      | <a href="http://www.rrhbn.org/documents/groupe/javel/tel/javel.pdf">http://www.rrhbn.org/documents/groupe/javel/tel/javel.pdf</a>                                                                                                                       |
| Ministère de la Santé et des Solidarités                          | Plan national de réponse à une menace de variole                                                                                                                    | Août 2006      | <a href="http://www.invs.fr/publications/variole_2001/variole_2001.html">http://www.invs.fr/publications/variole_2001/variole_2001.html</a>                                                                                                             |
| Ministère de la Santé et des Solidarités                          | Stratégies de réponse face à une menace d'agression par les agents de la peste, du charbon ou de la tularémie                                                       | Avril 2007     | <a href="http://www.invs.sante.fr/publications/guides_biotox/index.html">www.invs.sante.fr/publications/guides_biotox/index.html</a><br><a href="http://Afsaps.sante.fr/hm/10/piratox/indpira.htm">http://Afsaps.sante.fr/hm/10/piratox/indpira.htm</a> |

|                                                                                      |
|--------------------------------------------------------------------------------------|
| <b>ANNEXE 2 (suite)</b><br><b>Liste des maladies à déclaration obligatoire (MDO)</b> |
|--------------------------------------------------------------------------------------|

**30 maladies à déclaration obligatoire**

Botulisme  
Brucellose  
Charbon  
Chikungunya  
Choléra  
Dengue  
Diphthérie  
Fièvres hémorragiques africaines  
Fièvre jaune  
Fièvre typhoïde et fièvres paratyphoïdes  
Hépatite aiguë A  
Infection aiguë symptomatique par le virus de l'hépatite B  
Infection par le VIH quel qu'en soit le stade  
Infection invasive à méningocoque  
Légionellose  
Listériose  
Orthopoxviroses dont la variole  
Paludisme autochtone  
Paludisme d'importation dans les départements d'outre-mer  
Peste  
Poliomyélite  
Rage  
Rougeole  
Saturnisme de l'enfant mineur  
Suspicion de maladie de Creutzfeldt-Jakob et autres Encéphalopathies subaiguës spongiformes transmissibles humaines  
Tétanos  
Toxi-infection alimentaire collective  
Tuberculose  
Tularémie  
Typhus exanthématique

## ANNEXE 3

### Questionnaire pour l'accueil et l'orientation

# Accueil et orientation des patients en cours d'investigation pour une infection REB

Le présent document est une fiche technique pour la prévention du risque de transmission d'infection REB.

Il a pour objet de préciser **les modalités d'accueil et de tri des patients suspects**, notamment par l'usage d'**outils d'aide au diagnostic**.

A noter : Il est complémentaire de la procédure-type de prise en charge ci-dessus

Contenu :

- **Questionnaire accueil / tri des patients cas en cours d'investigation**
- **Mode d'emploi du questionnaire**
- **Diagramme décisionnel**

# Questionnaire accueil / orientation des patients « cas en cours d'investigation » pour suspicion d'infection REB

Nom ..... Hôpital.....  
Prénom ..... Service.....  
Sexe F M Nom infirmière .....  
Né(e) ..... Date.....  
N° admission ..... Heure.....

## Première étape : Repérage patient « cas possible »

### Evaluation par 1<sup>er</sup> intervenant soignant ou régulateur téléphonique

#### 1-1 Symptômes d'infection : fièvre (>38°C)

et/ autres signes d'appel : toux  dyspnée  diarrhée  éruption

et/ou autres symptômes  (précisez) : .....

## ET

1-2 Exposition : Retour de voyage oui  non  date de retour : .....

Lieu (pays / province/ ville) de l'exposition : ..... Date de l'exposition

\_\_/\_\_/\_\_

Autres circonstances :

Type ou nature de l'exposition : .....

Patient « cas possible » : Symptômes (1) et Exposition (2)

oui  non  → circuit de soins normal

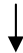

## Deuxième étape : Evaluation de la gravité par un médecin senior

2-1 Date des premiers signes cliniques.....

2-2 Constantes vitales : température..... °C, pouls...../mn, TA.....mmHg, FR...../mn,

SatO2.....% Sepsis

2-3 Symptômes et signes respiratoires : toux  dyspnée  SDRA

autres signes (décrire) : .....

2-4 Symptômes et signes digestifs (décrire) : .....

2-5 Symptômes et signes cutanés (décrire) : .....

2-6 Autres symptômes : .....

## Troisième étape : Conclusion confirmation par un médecin senior et validation patient « cas possible ou cas douteux »

oui  non  → circuit de soins normal

Tout patient cas possible est, à ce stade, dirigé vers un service référent.

Tout patient cas douteux peut faire l'objet d'investigations sur place

Nom médecin Senior

Coordonnées

Signature

Date

SAU-SAMU

## Mode d'emploi du Questionnaire accueil / tri des patients « cas en cours d'investigation » infection hautement contagieuse

Ce questionnaire a pour objectif de permettre aux professionnels de santé :

- repérer les « cas possibles », parmi les patients suspects
- valider médicalement les « cas possibles ou douteux » d'infection REB, afin de les orienter, au plus vite, vers une prise en charge adaptée.

### Première étape : Repérage patient « cas possible » et évaluation par un premier intervenant

Le repérage des patients « cas possibles », peut se faire par téléphone (permanencier de SAMU...) ou lors d'une consultation (infirmière d'accueil et d'orientation, consultation...)

La définition de « cas possible », pour certains agents infectieux, est disponible sur le site de l'InVS : (<http://www.invs.gouv.fr>).

Les chapitres des plans gouvernementaux définissent le cadre général de la prise en charge des patients suspects (<http://www.sante.gouv.fr>)

### Deuxième étape : Validation « cas possible » et évaluation de la gravité

L'évaluation de la gravité est assurée par un médecin senior du SAU-SAMU

### Troisième étape : Conclusion / Orientation des patients

La confirmation de « cas possible » est assurée par un médecin senior en liaison, si besoin par l'intermédiaire du centre 15, avec un médecin référent REB.

L'InVS est contacté pour confirmer le classement en « cas possibles » et organiser l'investigation épidémiologique autour du cas (sujets contacts) (tel : 01 41 79 67 00 ; fax : 01 41 79 68 72)

Tout patient « cas possible », même si son état clinique n'est pas grave, doit être transféré vers un service référent et hospitalisé dans celui-ci où seront réalisés les prélèvements à visée diagnostique et microbiologique spécifique.

Dans ce cas : 

- Maintenir les mesures barrières (masques...)
- Organiser le transfert du patient avec le SAMU, après avoir contacté le service référent de la Pitié-Salpêtrière pour diagnostic rapide et discussion du traitement anti infectieux

En cas d'afflux massif de patients suspects l'hôpital référent Co-REB est relayé par les hôpitaux :

- Bichat
- Raymond Poincaré
- Paul Brousse et
- Necker-Enfants Malades,
- suivis de l'ensemble des hôpitaux d'Ile de France ayant un service de maladies infectieuses et/ou un SAU

#### Coordination urgences infectieuses - Risque Epidémique et Biologique

|                                    |  |                |
|------------------------------------|--|----------------|
| • Pitié-Salpêtrière                |  |                |
| Service de maladies infectieuses : |  | 01 42 16 03 73 |
| Urgences :                         |  | 01 42 17 72 47 |
| • Bichat-Claude Bernard            |  |                |
| Service de maladies infectieuses : |  | 01 40 25 78 04 |
| Urgences :                         |  | 01 40 25 81 36 |
| • Necker-Enfants Malades           |  |                |
| Hospitalisation :                  |  | 01 42 19 26 23 |
| Urgences :                         |  | 01 44 49 20 90 |

### Information des services

Le service effectuant la prise en charge initiale doit informer (fiche de traçabilité) :

Centre Régional de Veille et d'Action sur les Urgences, APHP – fax standard : 01 40 27 38 50  
Plateforme régionale unique de réception des signaux sanitaires, ARS – fax n° 01 44 02 06 76  
SAMU du département et zonal – fax (disponible auprès du Centre 15)

COREB IDF- **Fiche de signalement**

**Origine signalement**

Hôpital :.....

Service déclarant: SAMU  Urgences  Maladies infectieuses  Autre .....

**Informations Patient**

Nom : ..... Prénom ..... Sexe : M  F  Né(e) le : ..../..../.....

Adresse : ..... Code Postal : \_ \_ \_ \_

Téléphone : \_ \_ \_ \_ \_ \_ \_ \_

Syndrome : Clinique :

Isolement :

**Prise en charge initiale**

Lieu de prise en charge initiale :  Hôpital (nom) : ..... Date : .../.../... Heure : .....

Aéroport (nom) :

Domicile

Autre : .....

**Orientation du patient**

Hôpital référent :  Pitié-Salpêtrière  Bichat  Necker-Enfants Malades

Paul Brousse  Raymond Poincaré

Autre (domicile, autre établissement...) : .....

Service d'accueil :  Maladies infectieuses  SAU  Réanimation  Autre : .....

Moyen de transport :  Ambulance  SMUR  Autre : .....

Transporteur (nom, coordonnées) : .....

**Qui a été informé ?**

InVS  ARS \_ \_ \_  Direction de l'hôpital

SAMU \_ \_ (préciser lequel)  Services référents  SAU hôpitaux référents

Autres : .....

Commentaires : .....

Nom du Médecin :

Tel : \_ \_ \_ \_ \_

Signature :

*A adresser, impérativement par fax 24h/24, numéros obtenus auprès du centre 15 à :*

**Centre Régional de Veille et d'Action sur les Urgences, AHP – fax standard : 01 40 27 38 50**

**Plateforme régionale unique de réception des signaux sanitaires, ARS – fax n° 01 44 02 06 76**

**Médecin COREB**

**SAMU départemental et SAMU zonal**

## ANNEXE 4

### Affiche isolement REB

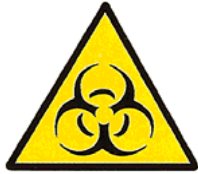

**!!! ATTENTION MESURES D'ISOLEMENT REB !!!**

**RISQUE EPIDEMIQUE ET BIOLOGIQUE (cf annexe 5)**

- 1. ISOLEMENT GEOGRAPHIQUE. Chambre seule, porte fermée. PERSONNEL DEDIE**
- 2. VISITES INTERDITES. PAS DE SORTIE du malade**
- 3. HABILLEMENT de la façon suivante en RESPECTANT CET ORDRE :**
  - Masque FFP2 bien ajusté**
  - Sur blouse imperméable, friction avec solution hydro alcoolique des mains**
  - 1 paire de gants usage unique, manchettes recouvrant les manches de la sur blouse**
  - Lunettes protectrices obligatoires en cas de geste invasif**
- 4. DANS LA CHAMBRE : après soins, retirer la sur blouse et la paire de gants**
  - Les mettre en sac jaune DASRI**
- 5. Sortie de la chambre : friction avec solution hydro alcoolique ; enlever et décontaminer les lunettes**
  - Eliminer le masque FFP2 en sac jaune DASRI ; 2<sup>e</sup> friction avec solution hydro alcoolique des mains**
- 6. MATERIEL A USAGE UNIQUE pour tous les soins**
- 7. Linge souillé : emballage hermétique, dans la chambre**
- 8. Poubelles jaunes DASRI dans la chambre et sur portique d'isolement**
- 9. Nettoyage renforcé toutes surfaces / détergent désinfectant : PERSONNEL SOIGNANT**

Procédure d'isolement COREB IDF - 2008.

A AFFICHER SUR LA PORTE DE LA CHAMBRE



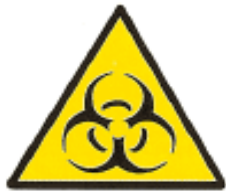

# PROCEDURE DE GESTION DU RISQUE EPIDEMIQUE ET BIOLOGIQUE AUX URGENCES

INFIRMIERE D'ACCUEIL ET D'ORIENTATION

INTERROGATOIRE +++

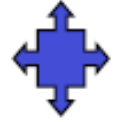

TOUX +/- DYSPNEE ET FIEVRE

DIARRHEE

ERUPTION

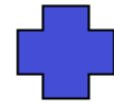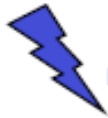

MASQUE patient anti projection

**ET CONTEXTE EVOCATEUR  
ALERTE, EPIDEMIE, EXPOSITION A RISQUE**

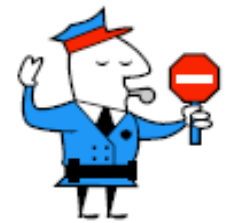

NON

OUI

PROCEDURES HABITUELLES

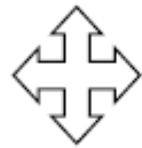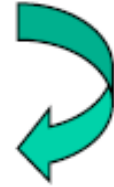

NON

NON

**INFORMATION MEDECIN SENIOR**

Interrogatoire, examen clinique  
Traitement symptomatique et spécifique  
\*\*\*

Evaluation du risque avec SAMU : appel 15

OUI

OUI

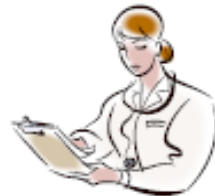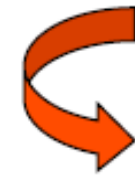

**ISOLEMENT STRICT  
COREB**

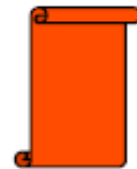

**TRANSFERT UNITE SPECIALISEE COREB**

## ANNEXE 5

### Procédures habillage - déshabillage

Gants à usage unique

Masques FFP2 jetables

Sur blouses jetables

Charlottes jetables\*

Sur chaussures jetables\*

Lunettes de protection décontaminables

Sacs pour DASRI

SHA : solution hydroalcoolique

Détergent/ désinfectant : Anios pH 7 (1 pression pour 5 litres d'eau)

Un support-poubelle se trouve à proximité pour l'élimination des déchets (conteneur + sac jaune).

#### **Le personnel doit s'habiller de la façon suivante en respectant cet ordre :**

Masque FFP2

Sur blouse

Charlotte\*

Sur chaussures\*

SHA (solution hydroalcoolique)

1 paires de gants (ou 2 selon les pathologies) dont la manchette recouvre les manches de la surblouse

Lunettes de protection décontaminables

\*Non indispensable, à utiliser selon risque

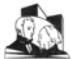

|                       |                 |                 |              |
|-----------------------|-----------------|-----------------|--------------|
| Emis par nom/service: | SAMU/H.Coignard | Date d'émission | Août 2008    |
| Validé par :          |                 | Référence :     | REB/2008     |
| Approuvé par :        |                 | Nbre de pages : | 1            |
| Périmé le :           | Décembre 2008   | Modifié le :    | 11 Août 2008 |

## PROCEDURES D'HABILLAGE POUR LES SOIGNANTS

La protection sera maximale en transport SMUR en raison du risque d'exposition des soignants intervenant auprès du patient suspect plus grand (en raison des manœuvres de transport).

**Le personnel doit s'habiller de la façon suivante en respectant cet ordre :**

### 1. En transport SMUR

Masque FFP2

Sur blouse

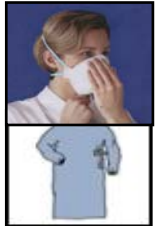

Charlotte, sur chaussures\*

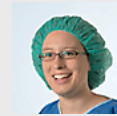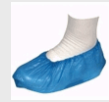

\*Non indispensables, à utiliser selon risque

SHA

Niveau orange\* : 1 seule paire de gants

Niveau rouge\*\* : 2 paires de gants, dont la manchette recouvre les manches de la sur blouse

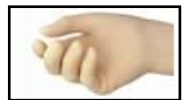

Lunettes de protection décontaminables, si geste invasif réalisé

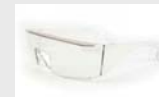

### 2. Au SAU

Masque FFP2

Sur blouse

SHA

Niveau orange : 1 seule paire de gants

Niveau rouge : 2 paires de gants, dont la manchette recouvre les manches de la sur blouse

Lunettes de protection décontaminables, si geste invasif réalisé

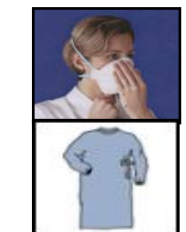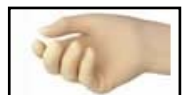

\* suspicion d'infection REB faible ou nulle

\*\* suspicion d'infection REB élevée

## SEQUENCE DE DESHABILLAGE DU PERSONNE SOIGNANT EN CAS DE PANDEMIE

### 1. Dans la chambre

1.1 → Retirer la **surblouse**

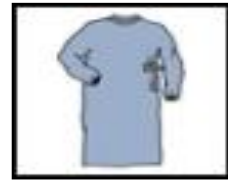

1.2 → Retirer les **gants à usage unique**

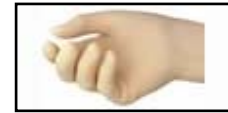

1.3 → **Elimination** des **déchets** dans un **sac DASRI**

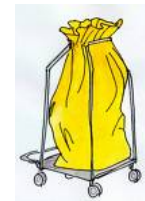

1.4 → Se frictionner les mains avec une **solution hydro-alcoolique**

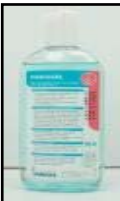

### 2. Sortir de la chambre

2.1 → Se frictionner les mains avec une **solution hydro-alcoolique**

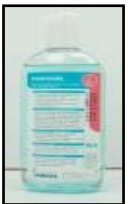

### 3. Devant la sortie, hors de la chambre

3.1 → Oter les **lunettes de protection** (\*si approprié)

→ Mettre les lunettes dans une **solution décontaminante**

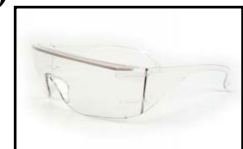

3.2 Retirer le **masque FFP2\*\***

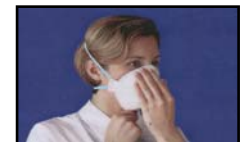

3.3 **Elimination** du masque dans un **sac DASRI**

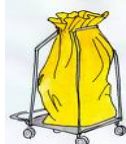

3.4 → Se frictionner les mains avec une **solution hydro-alcoolique**

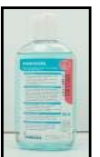

\* Réservées aux gestes à risque de projection = prélèvement nasopharyngé, intubation...

\*\* Technique adaptée pour éviter la contamination

## ANNEXE 6

### Fiches spécifiques pour certaines infections

## FIEVRES HÉMORRAGIQUES

### 1. Aspects épidémiocliniques, diagnostiques et thérapeutiques

Les fièvres hémorragiques virales regroupent des maladies infectieuses dues aux différents virus ayant en commun un tableau infectieux fébrile et des manifestations hémorragiques sévères.

Ce sont des virus à ARN, appartenant à trois familles :

- Filoviridae (Ebola, Marburg),
- Arenaviridae (Lassa, Machupo, Junin, Guanarito)
- Bunyaviridae (Crimée Congo)

Les virus Ebola, Marburg, Lassa, ainsi que Machupo et Junin peuvent être utilisés comme armes dans le bioterrorisme.

#### *Transmission*

- inconnue (Ebola, Marburg)
- rongeurs (Lassa, Machupo, Junin) inhalation d'aérosols infectieux à partir des excréments des rongeurs
- arthropodes (Crimée-Congo, Vallée du Rift) piqure de tique

Ce sont des maladies d'importation de territoires bien définis

A partir des cas primaires la contamination interhumaine se fait par contact direct avec le sang et les liquides biologiques contaminés (urines, selles) des patients infectés.

Les doses infectantes sont faibles 1-10 virions.

#### *Situation à risque*

##### Séjour en zone d'endémie ou d'épidémie

- Afrique centrale et australe : République Démocratique de Congo, Ouganda, Soudan, Gabon, Côte d'Ivoire,
- Asie (Russie, Turquie : Anatolie- Tokat, Sivas, Yozkat, Corum) et Europe de l'Est (Grèce, Bulgarie) pour Crimée Congo

##### Exposition au risque

- contact direct avec le sang, liquides biologiques infectés d'un patient (risque d'infection nosocomiale) ou d'un animal malade de fièvre hémorragique
- travail dans un laboratoire avec manipulation des virus responsables de fièvre hémorragique

*Incubation* : 2-21 jours

### ***Clinique***

Fièvre élevée, céphalée, conjonctivite, pharyngite, myalgies,  
douleurs abdominales, diarrhée,  
hémorragies diffuses, choc

Mortalité 70 % Ebola, 30 % Lassa

### ***Dg différentiel*** : paludisme

infections bactériennes, fièvre typhoïde, leptospirose, rickettsioses  
autres infections virales

### ***Diagnostic de certitude***

Prélèvements en service referant (niveau rouge)

PCR en temps réel sur le sang

La sérologie diagnostic rétrospectif tardif

### ***TRAITEMENT***

Il n'existe pas de traitement spécifique pour les Filoviridae

Ribavirine efficace sur les virus de Lassa et Crimée Congo)

(Ribavirine forme injectable = Virazole, forme orale = Rebetol)

Virazole disponible en ATU nominative

2 g iv en 15 min, puis 1 g ttes les 6 heures pdt 4 jours, puis 0,5 g ttes les 8 h pdt 6 jours

## **2. Particularités de la prise en charge des personnes suspectes de fièvres hémorragiques**

Isolement contact renforcé

- javérisation des surfaces et des liquides biologiques
- lunettes, gants double paires, charlotte, surchaussures
- patient habillé en pyjama ou casaque avec masque chirurgical

Evaluation de l'urgence

Pas d'examens biologiques en dehors des services référents

### ***Aspects spécifiques de transport en SAMU***

Patient habillé en pyjama ou casaque avec masque chirurgical

Soignants

Pyjama + casaque

Surchaussures et charlotte

Double paires de gants manches longues

Masque FFP2

Lunettes

Matériel médical, brancard ...procédure de nettoyage :  
nettoyeur vapeur, eau de javel en tenue de protection

# LA MALADIE DU CHARBON

## 1- Aspects épidémiologiques, diagnostiques et thérapeutiques

**Maladie du charbon** : maladie infectieuse causée par une bactérie formant des spores, *Bacillus anthracis*, et produisant une toxine très puissante pouvant être mortelle.

Maladie touchant les herbivores et pouvant être transmise à l'homme soit par contact avec les spores (forme résistante de la bactérie), soit par contact avec de la viande contaminée ou des produits d'animaux morts du charbon. Pas de transmission interhumaine. En Europe, forme humaine exceptionnelle grâce à la vaccination efficace des animaux.

Maladie se présentant sous 3 formes, en fonction du mode de contamination

- forme cutanée, secondaire au contact d'une plaie avec des spores, avec formation d'une escarre noirâtre
- forme respiratoire, par inhalation dans les alvéoles, de spores donnant naissance à des formes végétatives qui se multiplient dans les ganglions médiastinaux et produisent des toxines rapidement responsables d'une détresse respiratoire
- forme digestive après ingestion de viande contaminée, responsable d'une inflammation aiguë du tube digestif et d'une adénite mésentérique donnant un tableau abdominal pseudo-chirurgical

Diagnostic reposant sur la mise en évidence de la bactérie par l'examen direct et la culture d'un prélèvement cutané, d'un liquide biologique ou d'une hémoculture et par PCR

Traitement reposant sur la doxycycline ou la ciprofloxacine

**Culture de la bactérie et sa sporulation relativement faciles en laboratoire**  
→ Arme bactériologique idéale

## 2- Particularités de la prise en charge des personnes exposées dans le cadre d'une utilisation bioterroriste de la bactérie :

Pas de contagiosité, mais spores déposées sur les vêtements pouvant être transmises après ré-aérosolisation.

- Les éléments spécifiques supplémentaires, par rapport à la prise en charge standardisée, sont le masque FFP2, la charlotte, les surchaussures
- Isolement des sujets exposés à un aérosol potentiellement contaminant avec habillage (charlotte, combinaison, surchaussures, gants, masque) évitant l'aérosolisation secondaire des spores
- Protection du personnel assurant la prise en charge (charlotte, blouse, masque FFP2, gants avec manchettes, surchaussures)
- Décontamination des personnes après exposition, avec déshabillage, douche et shampooing et utilisation d'eau de javel si exposition cutanée directe visible
- Prophylaxie antibiotique post-exposition jusqu'aux résultats bactériologiques des prélèvements, reposant de première intention sur la prescription de fluoro-quinolones

# LES PNEUMOPATHIES A RISQUE EPIDEMIQUE ELEVE

## 1 Aspects épidémiocliniques, diagnostiques et thérapeutiques

Les pneumopathies à risque épidémique élevé regroupent les pathologies pulmonaires dues aux agents infectieux à haut potentiel épidémique, émergents ou réémergents.

Il peut s'agir des virus du SRAS, de la grippe aviaire, tuberculose multirésistante ou un nouveau virus ou bactérie émergents.

Le diagnostic sera évoqué devant des signes cliniques et une épidémiologie compatibles :

\*Fièvre >38°C associée à des signes d'atteinte respiratoire basse (toux, dyspnée)  
et

\*provenance d'un pays où existe actuellement une transmission active de  
pneumopathie à risque épidémique élevé (Asie, Moyen  
Orient, Europe de l'est)

ou

\*un contact avec un cas possible ou probable de pneumopathie à risque  
épidémique élevé

Agents infectieux suspectés :

- virus du SRAS coronavirus
- virus de la grippe aviaire / grippe pandémique Myxovirus Influenzae H5N1...HxNx
- tuberculose MDR, XDR
- autre pathogène émergent

diagnostic différentiel

pneumopathie bactérienne avec des signes de gravité (pneumocoque, legionella)

diagnostic de certitude

prélèvement en service référant (niveau rouge)  
PCR sur sécrétion bronchique, selles, urines  
Sérologie diagnostic rétrospectif tardif

Incubation 1-10 jours pour grippe et SRAS

## Traitement

Oseltamivir pour la grippe  
Traitement symptomatique, antibiothérapie

## 2 Particularités de la prise en charge des personnes présentant une pneumopathie à risque épidémique élevée

Mesures de protection respiratoire et contact (masque FFP2, blouse et gants)



## ANNEXE 7

### Gestion des prélèvements

#### Gestion des prélèvements en cas de procédures orange

Prévenir le biologiste de la suspicion de PHC

Tous les prélèvements sont placés dans un triple emballage réglementaire avec renseignements

Chaque échantillon biologique ou matière infectieuse sera transporté dans un kit d'emballage conforme aux normes prescrites par l'ONU (IATA 6.2) à savoir un kit d'emballage en **3 éléments** :

- un **emballage primaire étanche** contenant l'échantillon (flacons ou tubes selon le type de prélèvement)
- un **emballage secondaire étanche** (pot en plastique) renfermant l'emballage primaire
- un **emballage tertiaire en carton** pour le transport de l'ensemble

#### **DANS LA CHAMBRE (INFIRMIERE)**

##### **1. Préparer**

- Un haricot jetable, le matériel et les tubes nécessaires pour effectuer le(s) prélèvement(s).
- Une cuvette avec 3 l d'eau et 15 ml de javel diluée à 9° chlorée à changer quotidiennement.
- Les flacons de prélèvement concernés par la prescription médicale.
- Le sac plastique à « bulles » ou la mousse présents dans le container de transport.
- Du papier absorbant (type « sopalín »).

2. **Effectuer** le(s) prélèvement(s), fermer hermétiquement les emballages primaires.
3. **Immerger** les tubes primaires dans la solution javéalisée (Eau Javel 2.6 % chlore actif diluée au 1/10 < 24h), temps de contact 15 minutes et changer de gants.
4. **Sécher** les tubes, et les mettre sur un porte- tubes.
5. **Transmettre le porte tubes au collègue situé en dehors de la chambre.**
6. Pendant les 10 mn de trempage des tubes de prélèvement, faire le reste des soins dont l'environnement dont les toilettes (y mettre 100 cc de javel diluée), PULVERISER LE SURFANIOS SUR LA CHIFFONNETTE, puis enlever la 1<sup>ère</sup> paire de gants, sortir les tubes et les placer dans le kit avec l'aide de la collègue, enlever la casaque et la jeter dans le container près de la porte ainsi que la seconde paire de gants. A la sortie de la chambre remettre des gants pour retirer le masque. Retirer un gant, ouvrir le container de la main non gantée et jeter le tout.

#### **DEVANT LA CHAMBRE un autre collègue doit :**

1. **Etiqueter** les tubes.
2. **Introduire** rapidement les sacs plastiques à bulles ou la mousse contenant les prélèvements dans l'emballage secondaire étanche présenté par la co-équipière (habillée en tenue de base + un masque + une paire de gants) qui fermera l'emballage
3. **Glisser** l'emballage secondaire accompagné des papiers de demande d'examen (attention de respecter les demandes spécifiques dans l'emballage tertiaire en carton)
4. **Fermer** l'emballage, y apposer l'étiquette « Infectious substance »
5. **Identifier** le carton avec les coordonnées des services expéditeur et destinataire

## **ANNEXE 8**

### **Gestion des déchets et nettoyage du box d'isolement**

#### **Gestion des déchets**

Les déchets sont conditionnés dans les emballages réservés aux risques infectieux.

Le conditionnement doit être doublé d'un sur-emballage.

Leur entreposage se fait dans la chambre des patients et en dehors (tenue médicale) ??

Ils sont évacués et incinérés quotidiennement.

#### **Nettoyage et désinfection du box**

Le matériel jetable sera incinéré

Le linge jetable du patient est incinéré

Les déchets sont mis en double emballage (container + sac jaune).

Ils doivent être pris sur place par la société spécialisée.

L'entretien de la chambre est à réaliser selon le protocole en vigueur puis effectuer une désinfection terminale par voie aérienne par un Phagocept (en attente d'autorisation du CLIN).

## **ANNEXE 9**

### **Hôpitaux référents REB et acteurs institutionnels ARS, InVS, APHP**

#### **Hôpitaux référents REB**

##### Adultes :

- Hôpital Pitié Salpêtrière : 01 42 16 03 73
- Hôpital Bichat : 01 40 25 78 04
- Hôpital Raymond Poincaré : 01 47 10 79 00
- Hôpital Paul Brousse : 01 45 59 39 99

##### Enfants :

- Hôpital Necker : 01 42 19 26 23

#### **Acteurs institutionnels**

- Plateforme régionale unique de réception des signaux sanitaires, ARS :

Appel : 0 825 811 411

Fax : 01 44 02 06 76

- Appel InVS : 0 820 426 715

- Etablissement référent AP-HP

Appel : 01 40 27 32 24 ou 4630, heures ouvrables ou

01 40 27 30 00, administrateur de garde

# ANNEXE 10

## Groupe CO-REB

### Comité de Pilotage

**F. BRICAIRE**

Service de Maladies infectieuses et tropicales  
Hôpital Pitié Salpêtrière, APHP  
47 Boulevard de l'hôpital  
75013 PARIS

**P. CAMPHIN**

Gestion des crises sanitaires  
Direction de la Politique Médicale - AP-HP  
3, avenue Victoria  
75184 Paris cedex 04

**P. CARLI**

Service d'Anesthésie - Réanimation  
Hôpital NECKER – Enfants Malades, APHP  
149, rue de Sèvres  
75015 PARIS

**T. DEBORD**

Inspection Technique des Services Médicaux  
des Armées  
Hôpital du Val de Grâce  
1 place Alphonse Laveran  
75230 Paris Cedex 05

**C. LEPORT**

Unité CO REB - Pôle 3I  
Hôpital Pitié Salpêtrière, APHP  
47 Boulevard de l'hôpital  
75013 PARIS

**C. PERRONNE**

Département de Médecine Aiguë Spécialisée  
Hôpital Raymond Poincaré, APHP  
104, boulevard Raymond-Poincaré  
92380 GARCHES

### Groupe de Travail

**K. AN**

Médecine d'urgence SAMU 75  
et SMUR Necker  
Hôpital NECKER – Enfants Malades, APHP  
149, rue de Sèvres  
75015 PARIS

**H. COIGNARD**

Service des Maladies infectieuses et Tropicales  
SAMU 75  
Hôpital NECKER – Enfants Malades, APHP  
149, rue de Sèvres  
75015 PARIS

**F. DOLVECK**

SMUR Garches, SAMU 92  
Hôpital Raymond Poincaré, AP-HP  
104, boulevard Raymond-Poincaré  
92380 GARCHES

**L. ESCAUT**

Département de Médecine et d'Infectiologie  
Hôpital Paul Brousse, APHP  
14 Avenue Paul Vaillant Couturier  
94804 VILLEJUIF

**S. JAUREGUIBERRY**

Service de Maladies infectieuses et tropicales  
Hôpital Pitié Salpêtrière, APHP  
47 Boulevard de l'hôpital  
75013 PARIS

**JJ. LAURICHESSE**

Hôpital François Quesnay  
Service Maladies Infectieuses/Médecine Interne  
2 Bd Sully  
78200 MANTES LA JOLIE

**P. LONGUET**

Service des maladies infectieuses  
Hôpital Bichat, APHP  
46 Rue Henri Huchard  
75018 PARIS

**J. SALOMON**

Président du CLIN  
Hôpital Raymond Poincaré, APHP  
104, boulevard Raymond Poincaré  
92380 GARCHES

Avec la coopération du Dr. Marie-Eve  
Billemont, SAU, Hôpital Cochin
